# Supplementary material for: Analysis of the Fungi Community Variation during Rice Storage through High Throughput Sequencing
Source: MDPI journal article supplement (doi:10.3390/pr10040754), 2022-04-13
Supplement: s1 [file s1]

---

*Article*

# **Analysis of the fungi community variation during rice storage through high throughput sequencing**

**Supplementary Table S1** The effect of orientation, vertical position, and storage time on fungal alpha diversity and relative abundance of dominant Eumycota

|                | Orientation    | Vertical position | Storage time     |
|----------------|----------------|-------------------|------------------|
| Fungus-Shannon | (1.613, 0.204) | (0.075, 0.928)    | (0.190, 0.664)   |
| Fungus-Chao1   | (2.829, 0.064) | (0.254, 0.776)    | (11.930, 0.001)  |
| Ascomycota     | (3.020, 0.053) | (1.988, 0.142)    | (14.941, <0.001) |
| Basidiomycota  | (1.529, 0.222) | (0.468, 0.627)    | (0.149, 0.701)   |
| Mucoromucota   | (0.542, 0.583) | (0.445, 0.642)    | (17.627, <0.001) |

**Supplementary Table S2** Relative abundance of dominant fungi on the rice surface at the phylum level

|                   |    | Ascomycota<br>(%) | Basidiomycota<br>(%) | Mucoromycota<br>(%) |
|-------------------|----|-------------------|----------------------|---------------------|
| Orientation       | A  | 72.14 ±2.72b      | 8.75 ±1.77a          | 10.54 ±2.51a        |
|                   | C  | 82.24 ±2.49a      | 5.01 ±1.07a          | 7.50 ±2.09a         |
|                   | S  | 78.13 ±3.33ab     | 5.84 ±1.75a          | 10.58 ±2.49a        |
| Vertical position | L1 | 77.31 ±3.26a      | 6.61 ±1.72a          | 9.36 ±2.48a         |
|                   | L2 | 77.69 ±2.40a      | 5.93 ±1.26a          | 10.17 ±2.26a        |
|                   | L3 | 77.66 ±3.14a      | 7.01 ±1.73a          | 9.04 ±2.39a         |
| Storage time      | Y1 | 83.83 ±1.83a      | 6.87 ±1.22a          | 4.09 ±1.30b         |
|                   | Y2 | 71.39 ±2.60b      | 6.16 ±1.36a          | 14.87 ±2.17a        |

Different letters indicate significant differences at the phylum level ( $p < 0.05$ , Duncan's test, T-test).

Supplementary Table S3 Relative abundance of dominant fungal genera

|              | Orientation  |              |              | Vertical position |              |              | Storage time |              |
|--------------|--------------|--------------|--------------|-------------------|--------------|--------------|--------------|--------------|
|              | A            | C            | S            | L1                | L2           | L3           | Y1           | Y2           |
| Candida      | 5.07 ±1.77b  | 6.35 ±1.97b  | 17.26 ±4.38a | 7.75 ±2.77a       | 8.75 ±3.01a  | 12.18 ±3.42a | 12.08 ±3.05a | 7.04 ±1.80a  |
| Fusarium     | 16.97 ±6.68a | 18.70 ±3.15a | 10.63 ±2.39a | 11.24 ±2.72a      | 15.06 ±3.33a | 20.00 ±3.26a | 21.14 ±2.77a | 9.73 ±2.13b  |
| Rhizopus     | 9.21 ±2.39a  | 7.19 ±2.04a  | 10.19 ±2.46a | 9.14 ±2.47a       | 8.96 ±2.15a  | 8.50 ±2.30a  | 3.38 ±1.19b  | 14.35 ±2.14a |
| Aspergillus  | 29.55 ±3.35a | 29.81 ±3.68a | 25.96 ±3.48a | 34.41 ±3.84a      | 31.41 ±3.78a | 19.50 ±2.16b | 28.59 ±2.02a | 28.28 ±3.52a |
| Wallemia     | 1.82 ±0.57a  | 1.21 ±0.30a  | 2.03 ±0.74a  | 1.78 ±0.61a       | 1.71 ±0.55a  | 1.57 ±0.54a  | 2.08 ±0.53a  | 1.29 ±0.37a  |
| Pichiia      | 0.39 ±0.18a  | 2.28 ±1.24a  | 1.75 ±0.77a  | 1.38 ±0.74a       | 0.68 ±0.23a  | 2.35 ±1.25a  | 1.44 ±0.59a  | 1.50 ±0.79a  |
| Mucor        | 0.73 ±0.66a  | 0.02 ±0.01a  | 0.05 ±0.05a  | 0.02 ±0.01a       | 0.74 ±0.66a  | 0.05 ±0.03a  | 0.52 ±0.45a  | 0.01 ±0.00a  |
| Saitozyma    | 0.93 ±0.54a  | 0.47 ±0.24a  | 0.16 ±0.04a  | 0.32 ±0.11a       | 0.44 ±0.23a  | 0.79 ±0.53a  | 0.74 ±0.39a  | 0.30 ±0.08a  |
| Penicillium  | 1.22 ±0.25a  | 0.77 ±0.20ab | 0.48 ±0.06b  | 0.98 ±0.23a       | 0.97 ±0.22a  | 0.52 ±0.08a  | 0.94 ±0.17a  | 0.70 ±0.14a  |
| Cladosporiu  | 0.94 ±0.19a  | 0.59 ±0.12a  | 0.62 ±0.14a  | 0.77 ±0.21a       | 0.63 ±0.12a  | 0.75 ±0.12a  | 0.71 ±0.09a  | 0.72 ±0.16a  |
| m            | 1.29 ±0.72a  | 0.11 ±0.04a  | 0.22 ±0.15a  | 0.92 ±0.68a       | 0.29 ±0.22a  | 0.41 ±0.25a  | 0.20 ±0.14a  | 0.88 ±0.48a  |
| Magnaporthe  | 0.19 ±0.03a  | 0.36 ±0.16a  | 0.43 ±0.21a  | 0.22 ±0.05a       | 0.22 ±0.06a  | 0.54 ±0.25a  | 0.32 ±0.14a  | 0.33 ±0.11a  |
| Clonostachys | 0.57 ±0.15a  | 0.40 ±0.09a  | 0.32 ±0.07a  | 0.43 ±0.13a       | 0.31 ±0.08a  | 0.55 ±0.12a  | 0.46 ±0.09a  | 0.40 ±0.09a  |
| Sarocladium  | 0.24 ±0.04a  | 0.15 ±0.03a  | 0.19 ±0.04a  | 0.17 ±0.05a       | 0.18 ±0.03a  | 0.23 ±0.03a  | 0.22 ±0.03a  | 0.17 ±0.03a  |
| Alternaria   | 0.22 ±0.08a  | 0.37 ±0.15a  | 0.10 ±0.02a  | 0.21 ±0.08a       | 0.35 ±0.15a  | 0.13 ±0.03a  | 0.24 ±0.10a  | 0.21 ±0.07a  |
| Talaromyces  | 0.37 ±0.11a  | 0.12 ±0.03b  | 0.18 ±0.08ab | 0.26 ±0.09ab      | 0.08 ±0.02b  | 0.33 ±0.11a  | 0.25 ±0.07a  | 0.19 ±0.06a  |
| Paracoino-   | 0.19 ±0.04a  | 0.27 ±0.07a  | 0.31 ±0.12a  | 0.20 ±0.06a       | 0.35 ±0.12a  | 0.21 ±0.05a  | 0.32 ±0.08a  | 0.19 ±0.05a  |
| thyrium      | 0.11 ±0.02a  | 0.20 ±0.09a  | 0.16 ±0.05a  | 0.20 ±0.09a       | 0.12 ±0.04a  | 0.16 ±0.04a  | 0.07 ±0.01b  | 0.25 ±0.07a  |
| Curvularia   | 0.09 ±0.02a  | 0.22 ±0.09a  | 0.16 ±0.06a  | 0.18 ±0.09a       | 0.14 ±0.05a  | 0.15 ±0.05a  | 0.03 ±0.00b  | 0.28 ±0.07a  |
| Phaeo-       | 0.10 ±0.02b  | 0.31 ±0.09a  | 0.14 ±0.05b  | 0.15 ±0.05a       | 0.18 ±0.07a  | 0.22 ±0.06a  | 0.13 ±0.03a  | 0.24 ±0.06a  |
| sphaeria     | 0.27 ±0.05b  | 0.19 ±0.03a  | 0.17 ±0.04b  | 0.21 ±0.05a       | 0.16 ±0.03a  | 0.26 ±0.04a  | 0.18 ±0.03a  | 0.24 ±0.04a  |
| Ophio-       | 0.01 ±0.00a  | 0.02 ±0.01a  | 0.09 ±0.03a  | 0.01 ±0.00b       | 0.06 ±0.03b  | 0.05 ±0.02a  | 0.06 ±0.02a  | 0.02 ±0.01a  |
| sphaerella   | 0.07 ±0.02b  | 0.05 ±0.03b  | 0.03 ±0.01a  | 0.04 ±0.01a       | 0.08 ±0.04a  | 0.04 ±0.01a  | 0.04 ±0.01a  | 0.06 ±0.02a  |
| Nigrospora   | 0.05 ±0.02a  | 0.04 ±0.03a  | 0.08 ±0.05a  | 0.02 ±0.01a       | 0.10 ±0.06a  | 0.05 ±0.02a  | 0.06 ±0.04a  | 0.06 ±0.02a  |
| Pyrenocha-   | 0.17 ±0.17a  | 0.03 ±0.02a  | 0.01 ±0.00a  | 0.01 ±0.00a       | 0.01 ±0.00a  | 0.20 ±0.17a  | 0.14 ±0.11a  | 0.00 ±0.00a  |
| topsis       | 0.16 ±0.13a  | 0.11 ±0.09a  | 0.02 ±0.01a  | 0.01 ±0.00a       | 0.04 ±0.02a  | 0.24 ±0.16a  | 0.18 ±0.10a  | 0.01 ±0.00a  |
| Clavispora   | 1.13 ±0.59a  | 0.25 ±0.07a  | 1.90 ±1.45a  | 0.47 ±0.17a       | 0.60 ±0.18a  | 2.21 ±1.54a  | 0.34 ±0.10a  | 1.85 ±1.04a  |
| Setophoma    | 0.07 ±0.02a  | 0.17 ±0.06a  | 0.08 ±0.03a  | 0.08 ±0.03a       | 0.14 ±0.05a  | 0.10 ±0.04a  | 0.07 ±0.02a  | 0.14 ±0.04a  |
| Shiraia      | 0.08 ±0.06a  | 0.03 ±0.01a  | 0.07 ±0.03a  | 0.08 ±0.05a       | 0.04 ±0.02a  | 0.06 ±0.03a  | 0.03 ±0.01a  | 0.09 ±0.04a  |
| Rhodotorula  |              |              |              |                   |              |              |              |              |
| Naganishia   |              |              |              |                   |              |              |              |              |
| Tilletia     | 0.98 ±0.24a  | 1.68 ±0.64a  | 4.71 ±2.12a  | 2.60 ±1.30a       | 1.55 ±0.67a  | 3.22 ±1.74a  | 1.07 ±0.21a  | 3.84 ±1.48a  |
| Edenia       |              |              |              |                   |              |              |              |              |
| Diutina      |              |              |              |                   |              |              |              |              |
| Gibberella   |              |              |              |                   |              |              |              |              |

Different letters indicate significant differences ( $p < 0.05$ , Duncan's test, T-test).

**Supplementary Table S4** The relative abundance of 30 dominant fungal genera under different orientation, vertical position, and storage time

|                  | Orientation      | Vertical position | Storage time     |
|------------------|------------------|-------------------|------------------|
|                  | (21.609, <0.001) | (0.968, 0.383)    | (8.058, 0.005)   |
| Candida          | (4.209, 0.017)   | (2.349, 0.100)    | (6.515, 0.012)   |
| Fusarium         | (1.827, 0.166)   | (0.091, 0.913)    | (21.038, <0.001) |
| Rhizopus         | (0.159, 0.853)   | (5.400, 0.006)    | (11.981, 0.001)  |
| Aspergillus      | (2.126, 0.124)   | (0.147, 0.863)    | (2.464, 0.119)   |
| Wallemia         | (3.469, 0.035)   | (3.342, 0.039)    | (0.082, 0.776)   |
| Pichiia          | (3.966, 0.022)   | (4.226, 0.017)    | (4.616, 0.034)   |
| Mucor            | (3.041, 0.052)   | (1.509, 0.226)    | (3.980, 0.049)   |
| Saitozyma        | (9.379, <0.001)  | (4.342, 0.015)    | (1.034, 0.312)   |
| Penicillium      | (3.051, 0.052)   | (2.236, 0.112)    | (4.274, 0.041)   |
| Cladosporium     | (9.246, <0.001)  | (2.097, 0.128)    | (6.118, 0.015)   |
| Magnaporthe      | (2.310, 0.104)   | (4.376, 0.015)    | (0.073, 0.787)   |
| Clonostachys     | (3.163, 0.046)   | (1.256, 0.289)    | (0.516, 0.474)   |
| Sarocladium      | (1.217, 0.300)   | (0.706, 0.496)    | (0.331, 0.566)   |
| Alternaria       | (4.958, 0.009)   | (4.292, 0.016)    | (0.176, 0.676)   |
| Talaromyces      | (7.528, 0.001)   | (7.254, 0.001)    | (0.762, 0.385)   |
| Paracoinothyrium | (2.799, 0.065)   | (3.522, 0.033)    | (1.778, 0.185)   |
| Curvularia       | (2.524, 0.085)   | (1.796, 0.171)    | (16.123, <0.001) |
| Phaeosphaeria    | (4.364, 0.015)   | (0.956, 0.388)    | (25.835, <0.001) |
| Ophiosphaerella  | (13.716, <0.001) | (0.237, 0.789)    | (11.764, 0.001)  |
| Nigrospora       | (2.219, 0.114)   | (1.821, 0.167)    | (0.703, 0.404)   |
| Pyrenochaetopsis | (11.525, <0.001) | (3.872, 0.024)    | (4.468, 0.037)   |
| Clavispora       | (1.581, 0.211)   | (4.016, 0.021)    | (3.336, 0.071)   |
| Setophoma        | (0.761, 0.470)   | (4.571, 0.012)    | (0.062, 0.804)   |
| Shiraia          | (3.509, 0.033)   | (4.525, 0.013)    | (4.554, 0.035)   |
| Rhodotorula      | (2.380, 0.098)   | (7.434, 0.001)    | (9.185, 0.003)   |
| Naganishia       | (2.572, 0.081)   | (4.895, 0.009)    | (6.710, 0.011)   |
| Tilletia         | (6.141, 0.003)   | (1.941, 0.149)    | (8.138, 0.005)   |
| Edenia           | (3.112, 0.049)   | (0.928, 0.399)    | (9.347, 0.003)   |
| Diutina          | (8.027, 0.001)   | (0.976, 0.380)    | (11.032, 0.001)  |
| Gibberella       |                  |                   |                  |

**Supplementary Table S5** The relative abundance of core fungi OTUs in different storage orientations

|       | Name                      | Orientation    | Vertical position | Storage time     |
|-------|---------------------------|----------------|-------------------|------------------|
| OTU2  | Aspergillus               | (0.535, 0.587) | (0.936, 0.395)    | (3.125, 0.080)   |
| OTU4  | Candida                   | (3.975, 0.022) | (0.560, 0.573)    | (32.909, <0.001) |
| OTU14 | Candida                   | (1.235, 0.295) | (1.208, 0.303)    | (8.163, 0.005)   |
| OTU18 | Candida                   | (1.883, 0.157) | (0.005, 0.995)    | (20.992, <0.001) |
| OTU19 | Candida                   | (4.023, 0.021) | (1.235, 0.295)    | (4.146, 0.044)   |
| OTU49 | Candida                   | (0.947, 0.391) | (0.983, 0.378)    | (0.697, 0.406)   |
| OTU66 | unclassified-Aspergil-lus | (0.154, 0.857) | (1.158, 0.318)    | (20.496, <0.001) |

|        |             |                |                |                  |
|--------|-------------|----------------|----------------|------------------|
| OTU76  | Penicillium | (1.687, 0.190) | (0.953, 0.389) | (12.959, <0.001) |
| OTU77  | Fusarium    | (1.315, 0.273) | (0.841, 0.434) | (5.145, 0.025)   |
| OTU91  | Aspergillus | (0.038, 0.963) | (1.624, 0.202) | (0.129, 0.720)   |
| OTU96  | Aspergillus | (1.947, 1.148) | (1.306, 0.275) | (2.329, 0.130)   |
| OTU98  | Candida     | (4.209, 0.017) | (1.016, 0.366) | (4.722, 0.032)   |
| OTU103 | Candida     | (3.531, 0.033) | (0.633, 0.533) | (11.730, 0.001)  |
| OTU110 | Aspergillus | (0.021, 0.980) | (1.540, 0.219) | (32.102, <0.001) |
| OTU123 | Fusarium    | (1.767, 0.176) | (1.955, 0.147) | (6.135, 0.015)   |
| OTU125 | Penicillium | (1.820, 0.167) | (1.058, 0.351) | (10.234, 0.002)  |
| OTU143 | Aspergillus | (2.847, 0.062) | (0.119, 0.888) | (1.261, 0.264)   |
| OTU152 | Candida     | (3.899, 0.023) | (0.565, 0.570) | (20.111, <0.001) |
| OTU158 | Aspergillus | (0.552, 0.577) | (2.250, 0.110) | (22.229, <0.001) |
| OTU161 | Aspergillus | (0.369, 0.692) | (0.210, 0.811) | (23.506, <0.001) |
| OTU166 | Penicillium | (1.347, 0.264) | (2.048, 0.134) | (3.262, 0.074)   |
| OTU188 | Aspergillus | (0.075, 0.928) | (4.258, 0.017) | (6.989, 0.009)   |
| OTU201 | Aspergillus | (7.847, 0.001) | (0.782, 0.460) | (0.714, 0.400)   |
| OTU214 | Fusarium    | (0.975, 0.381) | (1.350, 0.264) | (0.245, 0.622)   |
| OTU215 | Aspergillus | (0.161, 0.852) | (1.096, 0.338) | (0.033, 0.856)   |
| OTU224 | Penicillium | (2.678, 0.073) | (0.680, 0.509) | (2.268, 0.135)   |
| OTU261 | Aspergillus | (1.666, 0.194) | (1.131, 0.327) | (13.532, <0.001) |
| OTU267 | Penicillium | (1.200, 0.305) | (2.008, 0.139) | (0.241, 0.625)   |
| OTU273 | Aspergillus | (1.302, 0.276) | (0.968, 0.383) | (1.207, 0.274)   |
| OTU287 | Aspergillus | (0.187, 0.830) | (2.275, 0.108) | (1.272, 0.262)   |
| OTU300 | Aspergillus | (0.346, 0.709) | (0.111, 0.895) | (7.888, 0.006)   |
| OTU309 | Penicillium | (1.334, 0.268) | (1.094, 0.339) | (2.916, 0.091)   |
| OTU311 | Aspergillus | (0.055, 0.947) | (2.648, 0.075) | (15.560, <0.001) |
| OTU312 | Aspergillus | (0.515, 0.599) | (0.903, 0.409) | (7.667, 0.007)   |
| OTU336 | Tilletia    | (1.042, 0.357) | (0.928, 0.398) | (0.688, 0.409)   |
| OTU338 | Penicillium | (1.204, 0.304) | (0.041, 0.960) | (8.044, 0.005)   |
| OTU352 | Gibberella  | (0.405, 0.668) | (0.285, 0.753) | (6.182, 0.014)   |
| OTU364 | Aspergillus | (0.600, 0.551) | (0.641, 0.529) | (1.806, 0.182)   |
| OTU370 | Aspergillus | (1.244, 0.292) | (3.195, 0.045) | (15.038, <0.001) |
| OTU459 | Aspergillus | (0.446, 0.641) | (0.342, 0.711) | (0.400, 0.528)   |
| OTU467 | Aspergillus | (0.106, 0.900) | (1.167, 0.315) | (4.600, 0.034)   |
| OTU469 | Aspergillus | (0.106, 0.900) | (0.471, 0.626) | (1.152, 0.286)   |
| OTU471 | Aspergillus | (0.065, 0.937) | (2.789, 0.066) | (6.582, 0.012)   |
| OTU473 | Aspergillus | (0.385, 0.682) | (0.347, 0.707) | (7.319, 0.008)   |
| OTU475 | Penicillium | (0.736, 0.482) | (1.656, 0.196) | (0.978, 0.325)   |
| OTU483 | Aspergillus | (0.652, 0.523) | (0.115, 0.891) | (0.510, 0.477)   |
| OTU485 | Aspergillus | (2.559, 0.082) | (0.632, 0.534) | (6.132, 0.015)   |
| OTU492 | Wallemia    | (0.779, 0.462) | (0.135, 0.874) | (3.033, 0.084)   |
| OTU493 | Aspergillus | (0.102, 0.903) | (0.819, 0.444) | (13.205, <0.001) |
| OTU496 | Aspergillus | (0.019, 0.981) | (0.947, 0.391) | (0.062, 0.803)   |
| OTU504 | Penicillium | (2.252, 0.110) | (0.257, 0.774) | (7.911, 0.006)   |
| OTU507 | Aspergillus | (0.809, 0.448) | (0.291, 0.748) | (10.252, 0.002)  |
| OTU513 | Gibberella  | (0.553, 0.577) | (3.036, 0.052) | (17.786, <0.001) |
| OTU525 | Candida     | (2.421, 0.094) | (1.132, 0.326) | (7.518, 0.007)   |
| OTU530 | Rhizopus    | (0.982, 0.378) | (2.774, 0.067) | (3.803, 0.054)   |
| OTU539 | Penicillium | (0.661, 0.518) | (0.879, 0.418) | (0.001, 0.976)   |
| OTU547 | Candida     | (2.447, 0.091) | (0.785, 0.459) | (6.044, 0.016)   |

|         |             |                |                 |                  |
|---------|-------------|----------------|-----------------|------------------|
| OTU556  | Aspergillus | (0.551, 0.578) | (0.621, 0.539)  | (21.403, <0.001) |
| OTU563  | Wallemia    | (1.535, 0.220) | (0.374, 0.689)  | (5.469, 0.021)   |
| OTU593  | Aspergillus | (0.328, 0.721) | (0.419, 0.659)  | (0.767, 0.383)   |
| OTU597  | Candida     | (4.139, 0.019) | (0.060, 0.942)  | (17.507, <0.001) |
| OTU607  | Aspergillus | (0.084, 0.919) | (0.143, 0.867)  | (1.917, 0.169)   |
| OTU617  | Pichia      | (0.974, 0.381) | (0.172, 0.842)  | (7.208, 0.008)   |
| OTU626  | Rhizopus    | (1.949, 0.148) | (0.946, 0.392)  | (15.923, <0.001) |
| OTU653  | Aspergillus | (0.996, 0.373) | (1.282, 0.282)  | (0.613, 0.435)   |
| OTU670  | Penicillium | (0.897, 0.411) | (1.065, 0.348)  | (14.635, <0.001) |
| OTU672  | Penicillium | (1.132, 0.326) | (0.138, 0.872)  | (2.752, 0.100)   |
| OTU673  | Aspergillus | (0.540, 0.585) | (0.373, 0.689)  | (17.406, <0.001) |
| OTU676  | Rhizopus    | (0.786, 0.458) | (0.004, 0.996)  | (21.010, <0.001) |
| OTU678  | Penicillium | (0.513, 0.600) | (1.235, 0.295)  | (0.004, 0.951)   |
| OTU703  | Aspergillus | (1.831, 0.165) | (0.222, 0.802)  | (12.846, 0.001)  |
| OTU721  | Aspergillus | (0.641, 0.529) | (0.225, 0.799)  | (6.941, 0.010)   |
| OTU723  | Tilletia    | (0.725, 0.487) | (1.371, 0.258)  | (6.680, 0.011)   |
| OTU727  | Aspergillus | (0.962, 0.385) | (0.108, 0.898)  | (0.669, 0.415)   |
| OTU767  | Candida     | (0.896, 0.411) | (1.006, 0.369)  | (4.589, 0.034)   |
| OTU785  | Rhizopus    | (2.695, 0.072) | (0.694, 0.502)  | (4.270, 0.041)   |
| OTU815  | Wallemia    | (1.423, 0.246) | (0.445, 0.642)  | (4.206, 0.043)   |
| OTU819  | Aspergillus | (1.631, 0.201) | (0.0627, 0.536) | (7.126, 0.009)   |
| OTU835  | Penicillium | (0.092, 0.921) | (0.074, 0.929)  | (3.545, 0.062)   |
| OTU842  | Aspergillus | (1.970, 0.145) | (1.049, 0.354)  | (15.401, <0.001) |
| OTU876  | Aspergillus | (0.542, 0.583) | (1.710, 0.186)  | (7.224, 0.008)   |
| OTU882  | Penicillium | (2.306, 0.105) | (0.390, 0.678)  | (0.347, 0.557)   |
| OTU886  | Penicillium | (0.996, 0.373) | (1.371, 0.258)  | (2.611, 0.109)   |
| OTU889  | Penicillium | (0.010, 0.990) | (1.990, 0.142)  | (9.563, 0.003)   |
| OTU891  | Penicillium | (1.045, 0.355) | (1.098, 0.337)  | (0.045, 0.832)   |
| OTU914  | Fusarium    | (0.251, 0.778) | (0.908, 0.407)  | (0.195, 0.660)   |
| OTU916  | Fusarium    | (1.469, 0.235) | (0.475, 0.623)  | (16.035, <0.001) |
| OTU923  | Aspergillus | (1.925, 0.151) | (1.075, 0.345)  | (3.910, 0.051)   |
| OTU926  | Penicillium | (0.328, 0.721) | (0.121, 0.886)  | (7.909, 0.006)   |
| OTU936  | Aspergillus | (0.287, 0.751) | (1.534, 0.220)  | (0.055, 0.814)   |
| OTU937  | Aspergillus | (0.446, 0.641) | (0.883, 0.416)  | (0.125, 0.724)   |
| OTU940  | Aspergillus | (0.153, 0.858) | (0.279, 0.757)  | (1.978, 0.163)   |
| OTU945  | Candida     | (0.911, 0.405) | (0.790, 0.457)  | (1.621, 0.206)   |
| OTU968  | Aspergillus | (1.896, 0.155) | (1.381, 0.256)  | (1.874, 0.174)   |
| OTU970  | Aspergillus | (0.300, 0.741) | (0.251, 0.778)  | (0.174, 0.677)   |
| OTU971  | Pichia      | (1.290, 0.280) | (1.082, 0.343)  | (0.034, 0.855)   |
| OTU986  | Fusarium    | (1.124, 0.329) | (0.306, 0.737)  | (1.981, 0.162)   |
| OTU997  | Aspergillus | (0.777, 0.463) | (0.247, 0.782)  | (0.646, 0.423)   |
| OTU998  | Penicillium | (1.006, 0.369) | (1.050, 0.354)  | (3.698, 0.057)   |
| OTU1001 | Penicillium | (1.365, 0.260) | (0.619, 0.540)  | (1.469, 0.228)   |
| OTU1012 | Wallemia    | (1.622, 0.202) | (1.101, 0.336)  | (0.113, 0.738)   |
| OTU1040 | Rhizopus    | (2.734, 0.070) | (0.629, 0.535)  | (16.640, <0.001) |

---

|         |              |                |                |                 |
|---------|--------------|----------------|----------------|-----------------|
| OTU1042 | Penicillium  | (0.216, 0.806) | (0.704, 0.497) | (0.477, 0.491)  |
| OTU1050 | Aspergillus  | (0.604, 0.548) | (1.458, 0.237) | (6.415, 0.013)  |
| OTU1107 | Penicillium  | (3.318, 0.047) | (1.702, 0.187) | (0.001, 0.971)  |
| OTU1132 | Penicillium  | (2.802, 0.065) | (1.493, 0.229) | (0.014, 0.905)  |
| OTU1153 | Cladosporium | (0.891, 0.413) | (1.891, 0.156) | (4.356, 0.039)  |
| OTU1157 | Fusarium     | (0.637, 0.531) | (1.450, 0.239) | (3.858, 0.052)  |
| OTU1182 | Candida      | (0.819, 0.444) | (0.813, 0.446) | (3.490, 0.065)  |
| OTU1184 | Pichia       | (0.910, 0.406) | (1.014, 0.336) | (4.077, 0.046)  |
| OTU1186 | Cladosporium | (1.713, 0.185) | (0.171, 0.843) | (4.428, 0.038)  |
| OTU1195 | Gibberella   | (2.779, 0.067) | (0.259, 0.772) | (12.883, 0.001) |
| OTU1218 | Wallemia     | (0.060, 0.942) | (0.306, 0.737) | (3.945, 0.050)  |
| OTU1225 | Wallemia     | (0.026, 0.974) | (0.590, 0.556) | (0.011, 0.918)  |
| OTU1226 | Aspergillus  | (0.293, 0.746) | (1.039, 0.357) | (0.475, 0.492)  |
| OTU1285 | Penicillium  | (0.552, 0.595) | (1.366, 0.260) | (3.483, 0.065)  |
| OTU1348 | Candida      | (4.975, 0.009) | (0.563, 0.571) | (7.968, 0.006)  |
| OTU1368 | Penicillium  | (0.899, 0.410) | (0.483, 0.618) | (3.904, 0.051)  |

---

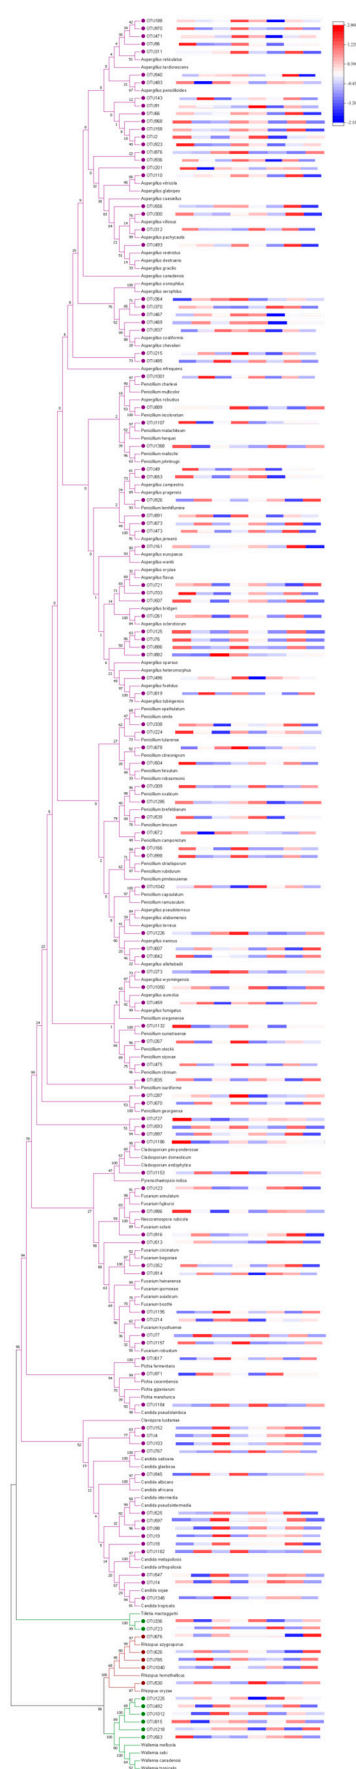

**Supplementary Figure S1. Evolutionary tree of the 43 fungal core OTU sequences from rice samples**
